# Supplementary material for: Effects of Reducing Sugars on the Structural and Flavor Properties of the Maillard Reaction Products of Lycium barbarum Seed Meal
Source: MDPI journal article supplement (doi:10.3390/foods12234346), 2023-12-01
Supplement: s1 [file s1]

Table S1 Volatile compounds detected in Maillard reaction products (MRPs) formed by different reducing sugars (ng/g)

| Count | Compounds                          | RI <sup>a</sup> | Amounts (ng/g) <sup>b</sup> |              |             |             |              |             | Odor description <sup>c</sup> |
|-------|------------------------------------|-----------------|-----------------------------|--------------|-------------|-------------|--------------|-------------|-------------------------------|
|       |                                    |                 | X-MRPs                      | F-MRPs       | A-MRPs      | Ga-MRPs     | G-MRPs       | Xo-MRPs     |                               |
|       | <b>Sulfur-containing compounds</b> | —               | 920.94                      | 303.71       | 390.09      | 147.61      | 655.19       | 93.32       | —                             |
|       | <b>Thiophene</b>                   | —               | 300.26                      | 162.88       | 133.82      | 142.18      | 283.08       | 52.95       | —                             |
| 1     | 3-Methyl-2-thiophenecarboxaldehyde | 1128            | 268.51±12.6a                | 125.55±1.5c  | 101.76±0.2d | 102.25±0.3d | 243.65b      | 52.95±0.3e  | Fatty taste                   |
| 2     | 5-Methyl-2-thiophenecarboxaldehyde | 1079            | 14.23±2.0b                  | 27.52±2.0b   | 25.81±2.1b  | 39.93±3.9a  | 7.74±0.5c    | ND          | —                             |
| 3     | 3-methyl-thiophene                 | 795             | 17.52±2.1b                  | 9.81±1.6c    | 6.25±0.5cd  | ND          | 26.52±5.2a   | ND          | Pungent                       |
| 4     | 2-thiophene acetic acid            | 1287            | ND                          | ND           | 3.45±0.12b  | ND          | 5.17±0.7a    | ND          | Nutty                         |
|       | thioalcohol                        | —               | 538.24                      | 137.25       | 224.90      | ND          | 326.78       | 35.74       | —                             |
| 5     | Furfuryl mercaptan                 | 923             | 207.73±44.4a                | 137.25±0.53c | 211.62±4.4a | ND          | 189.54±1.22b | 35.74±0.94d | Boiled meat                   |
|       | <b>Sulfur-containing compounds</b> | —               | 920.94                      | 303.71       | 390.09      | 147.61      | 655.19       | 93.32       | —                             |
| 6     | 2-pentanethiol                     | 816             | 12.74±0.38a                 | ND           | 13.28±1.8a  | 7.58±0.52c  | 11.86±0.06b  | ND          | Savory                        |
| 7     | 2-methyl-3-furanthiol              | 862             | 273.22±33.9a                | ND           | ND          | ND          | 125.38±0.49  | ND          | Meaty                         |
| 8     | 2-Methyl-3-pentanethiol            | 925             | 44.55±7.9a                  | ND           | ND          | ND          | ND           | ND          | —                             |
|       | <b>Sulfur-substituted furans</b>   | —               | 82.44                       | 3.58         | 31.37       | 5.43        | 45.33        | 4.63        | —                             |
| 9     | Bis(2-furfuryl)disulfide           | 1679            | 37.35±3.5a                  | ND           | ND          | ND          | 28.85±0.96b  | 4.63±0.63c  | burned taste                  |
| 10    | Bis(2-methyl-3-furyl)disulphide    | 1520            | 15.27±5.9b                  | 3.58±0.4d    | 21.84±3.5a  | 5.43±0.68c  | 16.48±0.49b  | ND          | Roast beef                    |
| 11    | 2-furyl-2-methyl-3-furyl disulfide | 1623            | 29.82±2.8a                  | ND           | 9.53±0.8b   | ND          | ND           | ND          | Floral                        |
|       | <b>Nitrogenous compounds</b>       | —               | 143.65                      | 70.77        | 58.65       | 37.47       | 110.72       | 28.59       | —                             |
|       | <b>pyridine</b>                    | —               | ND                          | 3.85         | 2.07        | ND          | 0.2          | ND          | —                             |

|    |                                                               |      |              |             |            |            |               |             |                  |
|----|---------------------------------------------------------------|------|--------------|-------------|------------|------------|---------------|-------------|------------------|
| 12 | Pyridine-N-oxide                                              | 1115 | ND           | ND          | ND         | ND         | 0.21±0.04a    | ND          | umami            |
| 13 | 3-carboxylic acid                                             | 1180 | ND           | 2.45±0.27a  | 2.07±0.2b  | ND         | ND            | ND          | —                |
| 14 | 3 - 1-methylbutyl                                             | 1342 | ND           | 1.40±0.2a   | ND         | ND         | ND            | ND          | Fruity           |
| 15 | 2-pyrrolidine methanol                                        | 887  | 143.65±13.8c | 66.92±8.1b  | 28.06±2.3d | 37.47±6.3d | 103.65±6.5a   | 28.59±0.59d | Fruity           |
|    | <b>Pyrazines</b>                                              | ND   | ND           | ND          | 28.52      | ND         | 6.86          | ND          | —                |
| 16 | 2-methyl-pyrazine                                             | 854  | ND           | ND          | 28.52±2.1a | ND         | ND            | ND          | Roasted          |
| 17 | Tetramethylpyrazine                                           | 1086 | ND           | ND          | ND         | ND         | 6.86±0.03a    | ND          | —                |
|    | <b>Oxygenated compounds</b>                                   | —    | 2325.09      | 1935.51     | 1596.32    | 966.6      | 1966.54       | 333.88      | —                |
|    | <b>furan</b>                                                  | —    | 576.46       | 64.52       | 211.63     | 22.67      | 406.21        | 39.89       | —                |
| 18 | 5-benzofuran ethylamine                                       | 1204 | 76.65±14.3a  | 44.58±0.4c  | ND         | ND         | 58.38±0.93b   | ND          | Savory           |
| 19 | 2-[(2-Ethoxy-3,4-dimethyl-2-cyclohexen-1-ylidene)methyl]furan | 1623 | 37.57±2.4a   | ND          | ND         | 13.09±0.9c | 25.68±0.83b   | ND          | —                |
| 20 | 5-chloro-n-(furan-2-ylmethyl) - 2-nitroaniline                | 1263 | 254.53±11.1a | ND          | ND         | ND         | 104.78±0.49b  | 39.89±0.69c | —                |
| 21 | 2-Furfurylthiol                                               | 916  | 207.7±44.4a  | ND          | 211.6±4.4a | ND         | 201.43±0.39a  | ND          | Coffee           |
| 22 | 2-Acetylfuran                                                 | 1032 | ND           | 19.94±3.5a  | ND         | 9.58±1.3b  | 15.94±1.2a    | ND          | Balsamic, Cocoa, |
|    | <b>Ketones</b>                                                | —    | 11.29        | 18.50       | 8.17       | 14.08      | ND            | ND          | —                |
| 23 | 2-heptanone                                                   | 839  | 11.29±0.46a  | 10.27±0.72a | 4.06±0.32b | 6.25±0.5b  | ND            | ND          | Nutty, Spice     |
| 24 | Acetone                                                       | 794  | ND           | ND          | 2.33±0.28a | ND         | ND            | ND          | —                |
| 25 | 2-pentanone                                                   | 934  | ND           | ND          | 1.78±0.15b | 7.83±0.5a  | ND            | ND          | Pungent          |
| 26 | 2-Nonanone                                                    | 1090 | ND           | 8.23±0.95a  | ND         | ND         | ND            | ND          | Fragrant         |
|    | <b>Alcohols</b>                                               | —    | 906.52       | 1325.92     | 778.28     | 670.67     | 7605.7        | 196.51      | —                |
| 27 | Benzyl alcohol                                                | 1275 | 27.72±11.15a | 4.87±0.27b  | ND         | ND         | 5.70±0.75b    | ND          | Roasted Bread    |
| 28 | Phenethyl alcohol                                             | 1373 | 18.56±7.83b  | 4.68±1.94c  | ND         | ND         | 145.13±11.95a | ND          | —                |

|    |                            |      |                   |                   |                    |                   |                |              |              |
|----|----------------------------|------|-------------------|-------------------|--------------------|-------------------|----------------|--------------|--------------|
| 29 | 1,2-benzenediol            | 1753 | 54.47±3.56e       | 254.43±31.2<br>6c | 345.26±36.26b      | 42.55±57.1<br>7a  | 33.17±4.45e    | 97.66±11.24d | —            |
| 30 | 1-hexanol                  | 991  | 34.14±2.13bc      | 97.36±24.63<br>a  | 47.83±5.24b        | 42.53±7.26<br>b   | 15.25±5.27cd   | 11.48±3.26d  | Grass, Herb  |
| 31 | 1-pentanol                 | 734  | ND                | 76.18±5.17a       | ND                 | ND                | ND             | ND           | Balsamic     |
| 32 | 1-butanol                  | 714  | ND                | 358.02±19.9<br>3a | ND                 | ND                | ND             | ND           | Fruity       |
| 33 | 1-decanol                  | 1081 | 45.74±1.47a       | 3.69±0.77c        | 4.09±0.58c         | ND                | ND             | 15.59±1.86b  | Fat, Oil     |
| 34 | 1-octen-3-ol               | 1161 | ND                | ND                | 49.53±8.36c        | 67.77±13.3<br>4b  | 74.17±5.13a    | ND           | —            |
| 35 | 2,7-dimethyl<br>-1-octanol | 1012 | ND                | ND                | 11.62±1.49a        | ND                | ND             | ND           | —            |
| 36 | 1,3-pentanediol            | 854  | 251.16±40.83<br>b | 509.63±39.1<br>3a | 248.53±30.23b      | 512.08±37.<br>83a | 332.35±17.47ab | 53.63±11.34c | Mushroom     |
| 37 | Hexaethylene glycol        | 2048 | 19.33±2.27a       | ND                | ND                 | ND                | ND             | ND           | fragrance    |
| 38 | 2-Hexadecanol              | 1793 | 36.64±20.72a      | 5.56±1.67cd       | 7.97± 1.95b        | 5.74±0.22b<br>c   | ND             | 18.15±1.73b  | Rose         |
| 39 | Octaethylene glycil        | 1566 | ND                | 7.43±1.58b        | 64.45±4.41a        | ND                | ND             | ND           | —            |
| 40 | Heptaethylene glycil       | 1542 | 418.76±39.48a     | 4.07±0.89b        | ND                 | ND                | ND             | ND           | —            |
|    | <b>Aldehydes</b>           | —    | 830.82            | 526.57            | 598.24             | 259.18            | 954.56         | 98.48        | —            |
| 41 | Hexanal                    | 872  | 549.52±45.85a     | 190.54±21.0<br>6b | 257.69±37.42b      | ND                | 251.55±8.28b   | 94.78±5.38c  | Apple, Fat   |
| 42 | Benzaldehyde               | 873  | 87.63±14.68a      | 132.44±45.2<br>8a | 151.66±16.23a<br>b | 118.58±26.<br>42a | 211.33±21.17a  | ND           | Bitterness   |
| 43 | Nonanal                    | 1105 | 34.47±3.72b       | 144.93±19.1<br>6a | 140.14±15.96a      | 116.48±18.<br>17a | 0.36±0.19b     | 1.19±0.63b   | Lemon,Floral |

|    |                          |      |               |             |             |            |               |            |                 |
|----|--------------------------|------|---------------|-------------|-------------|------------|---------------|------------|-----------------|
| 44 | Decanal                  | 1200 | 113.96±10.52a | 19.48±1.55c | 48.75±1.11b | 19.49±4.12 | 0.93±0.12d    | ND         | Citrus , orange |
|    |                          |      |               |             |             | c          |               |            |                 |
| 45 | 2,4-dimethylbenzaldehyde | 1528 | 28.47±2.12b   | 5.54±0.48b  | ND          | 4.63±0.98b | 385.67±34.84a | ND         | —               |
| 46 | 5-methylhexanal          | 1034 | 16.77±1.28c   | 33.66±4.08b | ND          | ND         | 104.72±6.26a  | 2.51±0.54d | Fruity          |
|    | <b>Esters</b>            | —    | 140.94        | 18.71       | 47.87       | 56.72      | 27.49         | ND         | —               |
| 47 | Ethyl laurate            | 1590 | 49.35±2.1a    | ND          | ND          | 36.47±1.6b | ND            | ND         | Aromatic        |
| 48 | Methyl eicosanoate       | 1705 | 45.82±2.6a    | 9.38±1.1b   | ND          | ND         | ND            | ND         | Almonds         |
| 49 | Isopropyl palmitate      | 1744 | 45.77±9.3a    | ND          | ND          | ND         | ND            | ND         | Bitter, Cocoa   |
| 50 | Diisooctyl diphosphate   | 1012 | ND            | 9.33±0.3d   | 47.87±3.4b  | 20.25±1.1c | 27.49±1.7a    | ND         | —               |
|    | <b>Hydrocarbon</b>       | ND   | ND            | 8.23        | 12.18       | ND         | ND            | ND         | —               |
| 51 | 2,4-dimethyl-1-heptene   | 836  | ND            | 8.23±0.5a   | —           | ND         | ND            | ND         | —               |
| 52 | 2-pentene                | 722  | ND            | ND          | 12.18±1.0a  | ND         | ND            | ND         | orange, honey   |

a

RI , retention index determined using the n-alkanes C7-C30 on DB-5MS column (30 m × 0.25 mm × 0.25 μm).

b

Means within different letters were significantly ( $p < 0.05$ ) different on the same line.

c

Odor descriptions were from FEMA database and literature (Wang et al.,2020; Qinzhu et al.,2018; Xie et al., 2022; Feng et al., 2018; Chun et al.,2020; Liu et al.,2022; Habinshuti et al., 2022).

Note: ND and “—” indicated not detected.

Table S2 Volatile compounds of Maillard reaction products (MRPs) formed from different reducing sugar types by GC-IMS

| Compound             | CAS#      | Formula                           | Peak area variation |         |         |         |         |         | Odor description |
|----------------------|-----------|-----------------------------------|---------------------|---------|---------|---------|---------|---------|------------------|
|                      |           |                                   | X-MRPs              | F-MRPs  | G-MRPs  | A-MRPs  | Ga-MRPs | Xo-MRPs |                  |
| 2-methylpropanal     | 78-84-2   | C <sub>4</sub> H <sub>8</sub> O   | 830.76              | 268.47  | 501.364 | 330.25  | 330.25  | 501.425 | —                |
| 2-Butenal            | 107-86-8  | C <sub>5</sub> H <sub>8</sub> O   | 466.20              | 211.20  | 150.65  | 501.36  | 478.23  | 355.42  | —                |
| Pentanal             | 110-62-3  | C <sub>5</sub> H <sub>10</sub> O  | 435.36              | 532.16  | 466.20  | 272.35  | 243.98  | 524.31  | Pungent          |
| Phenylacetaldehyde   | 122-78-1  | C <sub>8</sub> H <sub>8</sub> O   | 256.32              | ND      | 435.36  | ND      | 435.36  | ND      | Almond           |
| (E,E)-2,4-hexadienal | 142-83-6  | C <sub>6</sub> H <sub>8</sub> O   | ND                  | 510.26  | 453.63  | 302.13  | 202.28  | 265.94  | Nutty            |
| 3-methylbutanal      | 590-86-3  | C <sub>5</sub> H <sub>10</sub> O  | 210.35              | 374.52  | 390.10  | 76.82   | 374.52  | 86.48   | —                |
| 2-Methyl-2-propenal  | 78-85-3   | C <sub>4</sub> H <sub>6</sub> O   | 115.36              | ND      | ND      | 210.35  | ND      | 317.29  | —                |
| 3-Methyl-2-butenal   | 107-86-8  | C <sub>5</sub> H <sub>8</sub> O   | 653.24              | 115.36  | 210.3   | 139.87  | 410.35  | 104.23  | —                |
| Hexanal              | 66-25-1   | C <sub>6</sub> H <sub>12</sub> O  | 720.16              | 607.53  | 246.87  | 562.39  | 653.24  | ND      | Floral           |
| Butanal              | 123-72-8  | C <sub>4</sub> H <sub>8</sub> O   | 289.85              | 102.37  | 225.68  | ND      | 825.43  | 542.15  | Creamy           |
| (E)-2-Pentenal       | 157-68-70 | C <sub>5</sub> H <sub>8</sub> O   | ND                  | ND      | 320.47  | ND      | 745.36  | 258.46  | —                |
| Nonanal              | 124-19-6  | C <sub>9</sub> H <sub>18</sub> O  | ND                  | ND      | 58.71   | 48.581  | 110.86  | ND      | Fatty, green     |
| n-Heptanal           | 111-71-7  | C <sub>7</sub> H <sub>14</sub> O  | 475.25              | 352.16  | 142.57  | ND      | ND      | 265.28  | —                |
| Octanal              | 124-13-0  | C <sub>8</sub> H <sub>16</sub> O  | 420.16              | 226.12  | ND      | ND      | ND      | 56.67   | —                |
| (E,E)-2,4-Nonadienal | 591-08-72 | C <sub>9</sub> H <sub>14</sub> O  | 1076.91             | ND      | ND      | 818.39  | ND      | ND      | Tobacco          |
| n-propanol           | 71-23-8   | C <sub>3</sub> H <sub>8</sub> O   | 1706.02             | 1523.88 | 325.42  | 709.22  | 280.44  | 643.26  | Pungent          |
| Isopropanol          | 67-630    | C <sub>3</sub> H <sub>8</sub> O   | 1522.78             | 1563.77 | 539.40  | 128.04  | 140.82  | 80.64   | —                |
| benzyl alcohol       | 100-51-6  | C <sub>7</sub> H <sub>8</sub> O   | 3792.36             | ND      | ND      | ND      | ND      | 87.62   | Aromatic         |
| Z-3-Hexenol          | 928-96-1  | C <sub>6</sub> H <sub>12</sub> O  | ND                  | 984.97  | 1253.54 | 619.05  | 734.69  | ND      | Grass            |
| 2-methylbutanol      | 137-32-6  | C <sub>5</sub> H <sub>12</sub> O  | 2599.95             | ND      | ND      | ND      | 3291.32 | ND      | —                |
| Linalool             | 78-70-6   | C <sub>10</sub> H <sub>18</sub> O | ND                  | 2513.86 | 436.85  | 2875.21 | 2837.20 | ND      | Fruity           |
| 1-Propanol           | 78-83-1   | C <sub>4</sub> H <sub>10</sub> O  | 258.34              | ND      | 356.28  | 88.11   | 140.11  | 356.32  | Alcohol, Candy   |

|                          |            |                                              |         |          |         |         |         |         |                 |
|--------------------------|------------|----------------------------------------------|---------|----------|---------|---------|---------|---------|-----------------|
| 2-Phenylethanol          | 60-12-8    | C <sub>8</sub> H <sub>10</sub> O             | ND      | 352.80   | 753.54  | ND      | ND      | 256.38  | —               |
| 2-methylpropan-1-ol      | 78-83-1    | C <sub>4</sub> H <sub>10</sub> O             | 417.20  | 541.38   | 346.52  | 468.52  | 817.53  | 103.59  | —               |
| 2-Heptanol               | 543-49-7   | C <sub>7</sub> H <sub>16</sub> O             | 652.34  | 234.71   | 541.20  | 356.24  | 457.12  | ND      | Citrus, Fried   |
| hexan-2-ol               | 626-93-7   | C <sub>6</sub> H <sub>14</sub> O             | 300.87  | ND       | ND      | 247.31  | 425.38  | 857.68  | Mint, Cool      |
| 1-Octanol                | 111-87-5   | C <sub>8</sub> H <sub>18</sub> O             | 790.15  | ND       | 342.24  | 142.68  | 356.96  | 238.88  | Lemon           |
| 1-Hexanol                | 626-93-7   | C <sub>6</sub> H <sub>14</sub> O             | 225.32  | ND       | 412.53  | 356.28  | 732.23  | 175.43  | Flower          |
| 1-Hexen-1-ol             | 928-97-2   | C <sub>6</sub> H <sub>12</sub> O             | 125.39  | 2463.231 | 476.53  | ND      | 576.26  | ND      | —               |
| 1-Octanol                | 123-96-6   | C <sub>8</sub> H <sub>18</sub> O             | 780.65  | 953.96   | 258.49  | 1587.62 | 67.18   | 81.43   | —               |
| n-Heptanol               | 111-70-6   | C <sub>7</sub> H <sub>16</sub> O             | ND      | 860.86   | 485.22  | 1897.57 | 82.62   | 991.62  | Aromatic        |
| 2-furanmethanethiol      | 98-02-2    | C <sub>5</sub> H <sub>6</sub> OS             | 795.38  | ND       | 605.67  | ND      | 48.58   | 253.12  | Coffee, Roasted |
|                          |            |                                              |         |          |         |         |         |         | Meat            |
| 2-methylfuran-3-thiol    | 55764-25-5 | C <sub>5</sub> H <sub>6</sub> OS             | 812.64  | ND       | 3199.68 | 2413.15 | 17.021  | ND      | —               |
| 4-Methyl-thiazole        | 693-95-8   | C <sub>4</sub> H <sub>5</sub> NS             | 1253.59 | 338.54   | ND      | 6222.95 | 3451.13 | 64.05   | —               |
| 2-heptanone              | 110-43-0   | C <sub>7</sub> H <sub>14</sub> O             | 3166.50 | 2808.49  | 15.186  | 2665.34 | ND      | 1019.87 | —               |
| 2-Pentanone              | 565-61-7   | C <sub>6</sub> H <sub>12</sub> O             | ND      | ND       | ND      | 5079.44 | 32.831  | ND      | Fruit, Pungent  |
| 3-Pentanone              | 96-22-0    | C <sub>5</sub> H <sub>10</sub> O             | 132.89  | 44.68    | 368.47  | 69.40   | 79.28   | 199.01  | Grass           |
| Cyclohexanone            | 108-94-1   | C <sub>6</sub> H <sub>10</sub> O             | 88.48   | 180.82   | 14.19   | ND      | 245.78  | 67.18   | —               |
| 2,6-dimethyl-4-heptanone | 108-83-8   | C <sub>9</sub> H <sub>18</sub> O             | 553.34  | 328.27   | 258.36  | ND      | ND      | 82.62   | Fruit           |
| 2-Nonanone               | 925-78-0   | C <sub>9</sub> H <sub>18</sub> O             | 732.47  | 524.69   | 321.72  | 626.04  | 1463.23 | 48.58   | —               |
| Octan-2-one              | 111-13-7   | C <sub>8</sub> H <sub>16</sub> O             | 895.36  | ND       | ND      | 564.74  | 953.96  | 17.02   | —               |
| 5-Nonanone               | 502-56-7   | C <sub>9</sub> H <sub>18</sub> O             | 742.01  | 2837.20  | ND      | 795.86  | 860.86  | ND      | Grilled         |
| 3-Nonanone               | 925-78-0   | C <sub>9</sub> H <sub>18</sub> O             | 335.82  | 436.21   | 199.01  | 245.41  | ND      | 1551.04 | —               |
| 3(2H)-Furanone           | 3511-31-7  | C <sub>5</sub> H <sub>8</sub> O <sub>2</sub> | ND      | ND       | 67.18   | 2821.75 | ND      | 32.83   | Grass           |
| THF (tetrahydrofuran)    | 18039-90-2 | C <sub>4</sub> H <sub>8</sub> O              | 113.96  | 315.39   | 82.62   | 1436.64 | 338.54  | 79.28   | Mint            |
| 2-ethyl furan            | 3208-16-0  | C <sub>6</sub> H <sub>8</sub> O              | 28.47   | ND       | 48.58   | 45.77   | ND      | 245.78  | Burnt           |
| Furan                    | 625-86-5   | C <sub>6</sub> H <sub>8</sub> O              | 48.77   | 2649.20  | 56.02   | 60.95   | 289.67  | 242.69  | Caramel         |

|                                       |            |                                                |        |         |         |         |        |         |                     |
|---------------------------------------|------------|------------------------------------------------|--------|---------|---------|---------|--------|---------|---------------------|
| 2,5-dimethyl-4-hydroxy-3(2H)-furanone | 3658-77-3  | C <sub>6</sub> H <sub>8</sub> O <sub>3</sub>   | 140.94 | ND      | ND      | 752.34  | 415.54 | 369.58  | Fruity,Caramel      |
| Methyl acetate                        | 79-20-9    | C <sub>3</sub> H <sub>6</sub> O <sub>2</sub>   | 189.65 | 480.61  | 1251.04 | 45.82   | 460.21 | 120.39  | —                   |
| Methyl heptanoate                     | 106-73-0   | C <sub>8</sub> H <sub>16</sub> O <sub>2</sub>  | ND     | ND      | 542.13  | 672.51  | 231.24 | 100.78  | Slightly            |
| ethyl isovalerate                     | 108-64-5   | C <sub>7</sub> H <sub>14</sub> O <sub>2</sub>  | ND     | 1330.34 | 986.35  | 250.35  | 124.36 | ND      | —                   |
| Ethyl butyrate                        | 105-54-4   | C <sub>6</sub> H <sub>12</sub> O <sub>2</sub>  | 247.32 | 637.29  | ND      | 113.96  | ND     | 1810.47 | —                   |
| Butyl formate                         | 592-84-7   | C <sub>5</sub> H <sub>10</sub> O <sub>2</sub>  | 512.34 | 342.15  | 225.39  | 473.52  | 426.39 | 573.03  | Fruity              |
| butyl butanoate                       | 109-21-7   | C <sub>8</sub> H <sub>16</sub> O <sub>2</sub>  | 352.71 | ND      | 257.16  | 421.58  | 353.09 | 504.20  | Bread               |
| ethyl heptanoate                      | 106-30-9   | C <sub>9</sub> H <sub>18</sub> O <sub>2</sub>  | 428.50 | ND      | 325.46  | 785.69  | ND     | 940.23  | —                   |
| Ethyl isopentanoate                   | 108-64-5   | C <sub>7</sub> H <sub>14</sub> O <sub>2</sub>  | ND     | 245.36  | 176.80  | ND      | 107.56 | ND      | Floral, Green Apple |
| amyl acetate                          | 628-63-7   | C <sub>7</sub> H <sub>14</sub> O <sub>2</sub>  | 574.23 | 258.65  | ND      | 104.56  | 986.5  | ND      | Balsamic aroma      |
| Methyl benzoate                       | 93-58-3    | C <sub>8</sub> H <sub>8</sub> O <sub>2</sub>   | 936.25 | ND      | 457.96  | 783.24  | ND     | 540.13  | Fruity              |
| ethyl octanoate                       | 106-32-1   | C <sub>10</sub> H <sub>20</sub> O <sub>2</sub> | 356.28 | 421.01  | 852.42  | 754.32  | 201.54 | 320.15  | Grilled             |
| Butyl acetate                         | 123-86-4   | C <sub>6</sub> H <sub>12</sub> O <sub>2</sub>  | ND     | ND      | 174.00  | ND      | ND     | 85.63   | Fruity              |
| Pentyl butyrate                       | 540-18-1   | C <sub>9</sub> H <sub>18</sub> O <sub>2</sub>  | 452.16 | 296.15  | 223.14  | 632.15  | ND     | 65.32   | —                   |
| Ethyl acetate                         | 141-78-6   | C <sub>4</sub> H <sub>8</sub> O <sub>2</sub>   | 75.85  | 152.39  | 55.65   | 254.63  | 410.96 | 360.12  | Apple, Banana       |
| isopentyl acetate                     | 123-92-2   | C <sub>7</sub> H <sub>14</sub> O <sub>2</sub>  | 53.28  | ND      | ND      | ND      | ND     | ND      | Fruity              |
| 2,5-dimethylpyrazine                  | 123-32-0   | C <sub>6</sub> H <sub>8</sub> N <sub>2</sub>   | 223.30 | 392.31  | ND      | 290.65  | 470.97 | 377.53  | Fried flower        |
| 2-ethyl-6-methylpyrazine              | 13925-03-6 | C <sub>7</sub> H <sub>10</sub> N <sub>2</sub>  | ND     | 535.39  | ND      | 311.02  | 425.89 | 324.59  | Nutty               |
| 2-Acetylpyridine                      | 1122-62-9  | C <sub>7</sub> H <sub>7</sub> NO               | 101.62 | 137.22  | ND      | 490.23  | 54.09  | 75.68   | —                   |
| 2-acetylpyrrole                       | 1072-83-9  | C <sub>6</sub> H <sub>7</sub> NO               | 324.15 | ND      | 2139.82 | ND      | 504.27 | ND      | Bread, Cocoa        |
| Aniline                               | 62-53-3    | C <sub>6</sub> H <sub>7</sub> N                | 315.39 | 509.21  | 406.6   | 2485.04 | 20.12  | 704.78  | Stimulating         |
| 2,6-Dimethylaniline                   | 87-62-7    | C <sub>8</sub> H <sub>11</sub> N               | ND     | 654.35  | 350.66  | 311.10  | ND     | 338.54  | —                   |
| Triethylenediamine                    | 280-57-9   | C <sub>6</sub> H <sub>12</sub> N <sub>2</sub>  | ND     | 1330.43 | ND      | ND      | 176.80 | 993.80  | —                   |
| Triethylamine                         | 121-44-8   | C <sub>6</sub> H <sub>15</sub> N               | ND     | ND      | 1974.53 | 858.17  | 185.93 | 979.22  | —                   |

|                              |            |                                               |         |         |         |        |         |        |             |
|------------------------------|------------|-----------------------------------------------|---------|---------|---------|--------|---------|--------|-------------|
| Isoprene                     | 78-79-5    | C <sub>5</sub> H <sub>8</sub>                 | 1231.45 | 258.96  | 372.32  | 107.52 | 101.08  | 225.85 | —           |
| <i>β</i> -Myrcene            | 123-35-3   | C <sub>10</sub> H <sub>16</sub>               | ND      | ND      | 518.20  | 336.75 | ND      | ND     | —           |
| Styrene                      | 100-42-5   | C <sub>8</sub> H <sub>8</sub>                 | 90.13   | ND      | ND      | 102.56 | 247.15  | 651.02 | Toasted     |
| Limonene                     | 138-86-3   | C <sub>10</sub> H <sub>16</sub>               | 463.25  | ND      | 1020.45 | ND     | 1210.53 | 327.89 | —           |
| <i>α</i> -Pinene             | 80-56-8    | C <sub>10</sub> H <sub>16</sub>               | 147.69  | 514.10  | ND      | 312.50 | ND      | 451.78 | Nutty       |
| 2,2,4,6,6-Pentamethylheptane | 13475-82-6 | C <sub>12</sub> H <sub>26</sub>               | 463.35  | ND      | 465.38  | ND     | 120.36  | 338.54 | Fruity      |
| acetic acid                  | 64-19-7    | C <sub>2</sub> H <sub>4</sub> O <sub>2</sub>  | ND      | 743.486 | ND      | 634.29 | ND      | ND     | Stimulating |
| 3-Methylbutanoic acid        | 503-74-2   | C <sub>5</sub> H <sub>10</sub> O <sub>2</sub> | 498.63  | 223.30  | 165.37  | 358.17 | 120.98  | ND     | —           |
| Methional                    | 3268-49-3  | C <sub>4</sub> H <sub>8</sub> OS              | 242.36  | 197.93  | 85.63   | ND     | 369.85  | ND     | Sulphur     |
| Butanoic acid                | 107-92-6   | C <sub>4</sub> H <sub>8</sub> O <sub>2</sub>  | ND      | 247.8   | 175.68  | 569.75 | 471.30  | 410.35 | Stimulating |
| 2-Methylpropanoic acid       | 79-31-2    | C <sub>4</sub> H <sub>8</sub> O <sub>2</sub>  | 105.29  | ND      | ND      | 849.33 | ND      | 652.31 | —           |
| 3-Butenenitrile              | 109-75-1   | C <sub>4</sub> H <sub>5</sub> N               | ND      | 353.09  | 504.20  | 404.91 | ND      | 780.22 | —           |

Note: “ND” and “—” indicated not detected.
